# Supplementary material for: Longitudinal visual field archetypal analysis of optic neuritis treated in a clinical setting
Source: HighWire-hosted journal article supplement (doi:10.1136/bmjophth-2022-001136), 2022-11-01
Supplement: bmjophth-2022-001136supp001_data_supplement.pdf [file bmjophth-2022-001136supp001_data_supplement.pdf]

**Supplemental Figures and Tables****Residual Sums of Squares**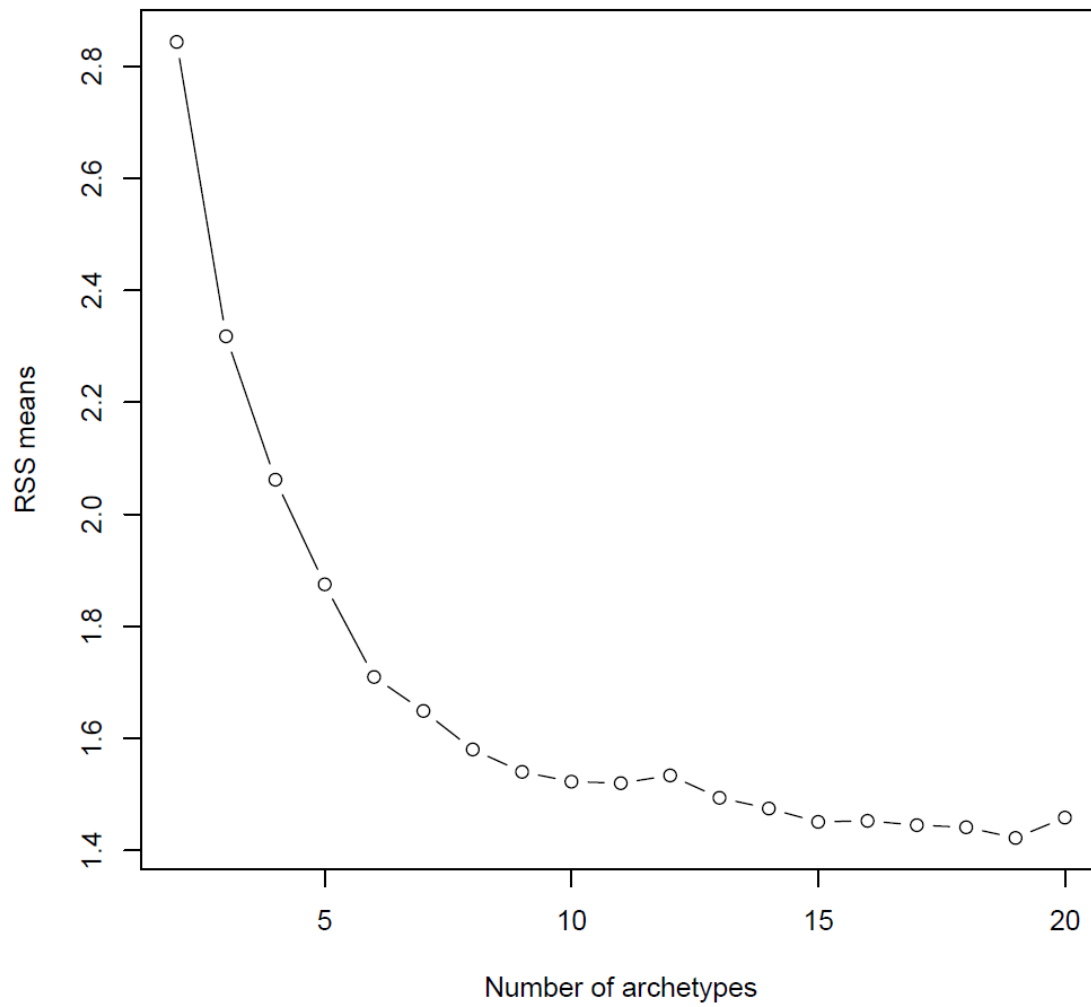

Supplemental Figure 1. Residual sum of squares (RSS) plot created for selection of the clinic-derived AT model.

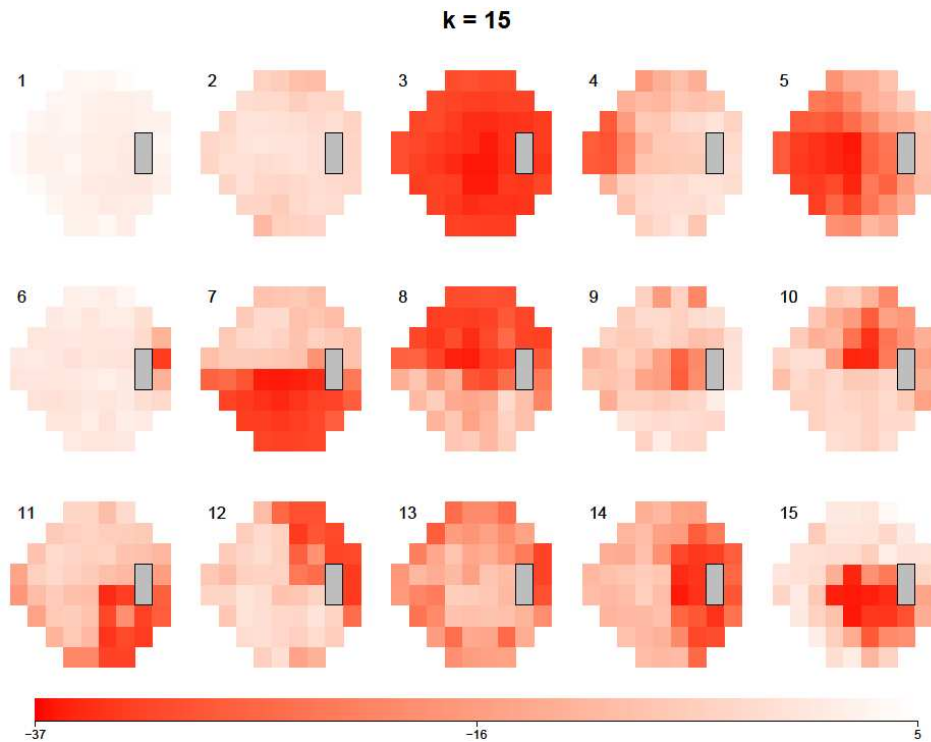

Supplement Figure 2 shows the 15 archetype model using the clinic optic neuritis visual fields. Note the patterns are similar to the 16 archetype model used for the study. Scale is -37 to 5 dB.

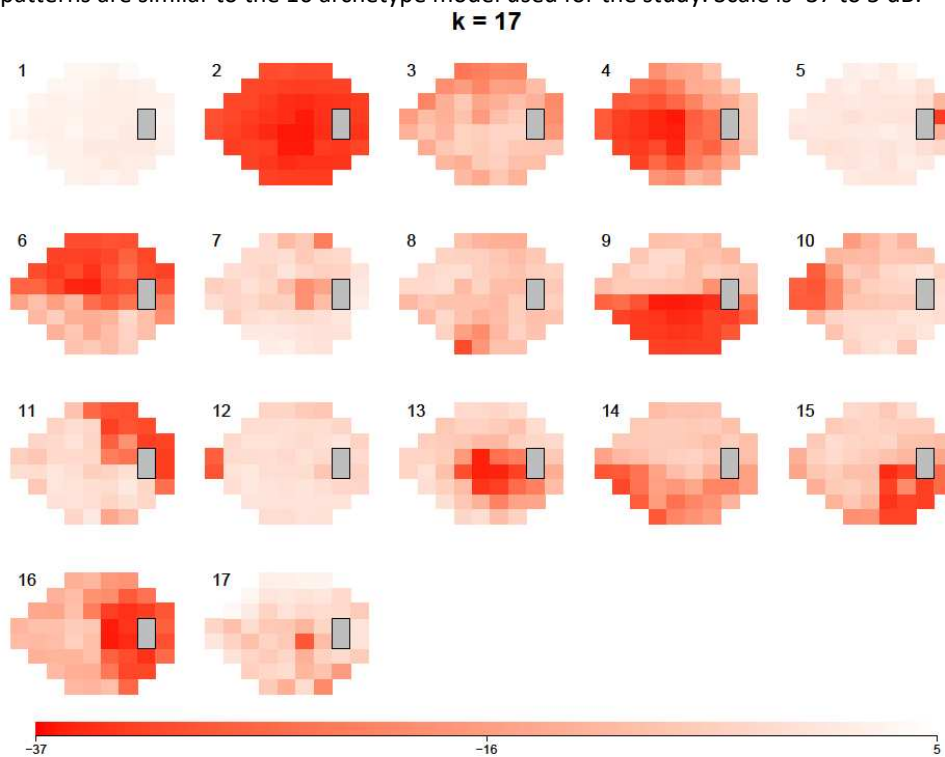

Supplement Figure 3 shows the 15 archetype model using the clinic optic neuritis visual fields. Note the patterns are similar to the 16 archetype model used for the study. Scale is -37 to 5 dB

| Clinic-derived AT | RW (%) | Avg. TD (dB) | ONTT-derived AT | RW (%) | Avg. TD (dB) |
|-------------------|--------|--------------|-----------------|--------|--------------|
| AT1               | 44.5   | 1.94         | AT1             | 40.17  | 1.97         |
| AT3               | 7.6    | -33.10       | AT2             | 9.35   | -31.93       |
| AT4               | 4.9    | -21.91       | AT7             | 4.16   | -17.36       |
| AT6               | 4.0    | -23.53       | AT12            | 2.34   | -18.05       |
| AT7               | 3.7    | -19.46       | AT11            | 2.57   | -19.13       |
| AT8               | 3.7    | -6.72        | AT5             | 5.17   | -5.43        |
| AT10              | 3.5    | -11.19       | AT4             | 5.29   | -11.28       |
| AT11              | 3.3    | -10.42       | AT10            | 3.06   | -7.34        |
| AT12              | 2.3    | -13.11       | AT15            | 2.08   | -7.99        |
| AT13              | 2.0    | -17.67       | AT14            | 2.22   | -14.76       |
| AT15              | 1.5    | -23.11       | AT13            | 2.32   | -20.54       |

Supplemental Table 1: Relative weights (RWs) and average total deviation (TD) values for clinic-derived ATs and the Optic Neuritis Treatment Trial (ONTT)-derived ATs with similar patterns of loss.

|                | Clinic-derived | ONTT-derived | P-value |
|----------------|----------------|--------------|---------|
| All severities | 285.55         | 325.61       | 0.10    |
| MD<-15 dB      | 1211.40        | 1366.33      | 0.62    |
| -15≤MD<-7 dB   | 1070.69        | 1358.03      | 0.58    |
| -7 ≤MD<-2 dB   | 265.29         | 269.15       | 0.47    |
| MD≥-2 dB       | 116.65         | 141.48       | 0.29    |

Supplemental Table 2. Average SSE values for reconstruction of clinic VFs collected at final visits only using clinic-derived and Optic Neuritis Treatment Trial (ONTT)-derived models.

|                | Clinic-derived | ONTT-derived | P-value |
|----------------|----------------|--------------|---------|
| All severities | 552.12         | 642.44       | <0.001  |
| MD<-15 dB      | 1284.96        | 1562.34      | <0.001  |
| -15≤MD<-7 dB   | 1056.89        | 1252.78      | 0.02    |
| -7 ≤MD<-2 dB   | 321.30         | 322.28       | 0.94    |
| MD≥-2 dB       | 126.19         | 150.09       | 0.11    |

Supplemental Table 3. Average SSE values for reconstruction of all clinic VFs using clinic-derived and Optic Neuritis Treatment Trial (ONTT)-derived models.
